# Supplementary material for: Increased IgE-dependent mast cell activation and anaphylactic responses in mice lacking the calcium-activated nonselective cation channel TRPM4
Source: Springer Nature journal article supplement (doi:10.1038/ni1441), 2007-02-11
Supplement: 41590_2007_BFni1441_MOESM31_ESM.pdf [file 41590_2007_BFni1441_MOESM31_ESM.pdf]

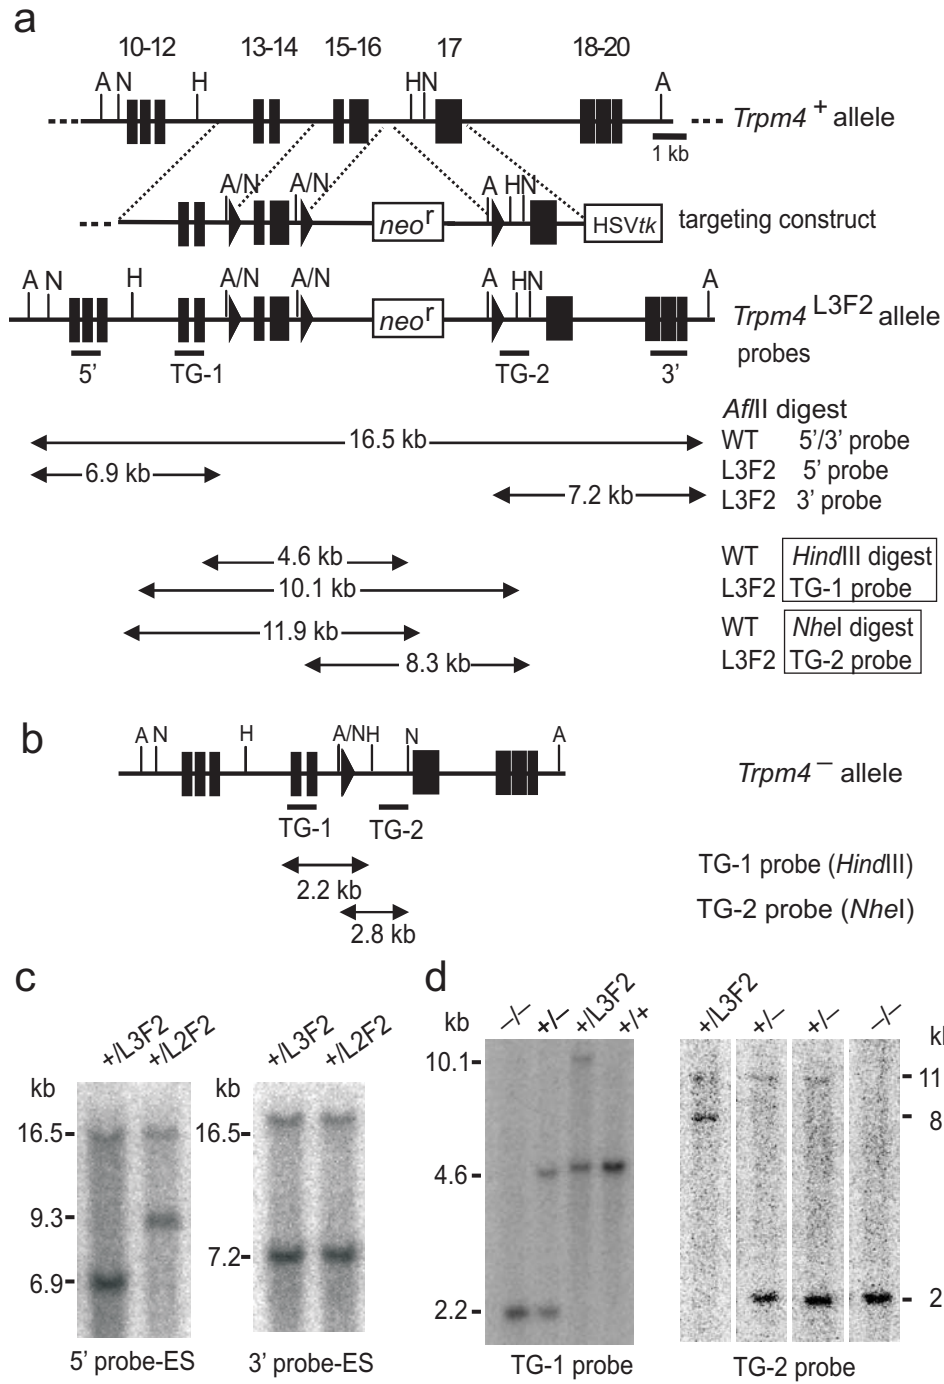

**Supplementary Figure 1.** Targeted disruption of the *Trpm4* gene. We used the Cre-loxP strategy to excise exons 15 and 16, which encode the first transmembrane-spanning domain of TRPM4. **(a)** The wild type *Trpm4* allele, targeting construct and recombinant *Trpm4*<sup>L3F2</sup> allele. Translated exons (not in scale) are shown as filled boxes. The *Trpm4*<sup>L3F2</sup> allele contains one loxP site (filled triangles) upstream, and a loxP-flanked PGK-*neo*<sup>r</sup> cassette downstream, of exon 16. H, *Hind*III; A, *Afl*II; N, *Nhe*I. Probes and sizes of genomic DNA fragments as expected by Southern blots are indicated. **(b)** Cre-mediated conversion of the *Trpm4*<sup>L3F2</sup> allele to the *Trpm4*<sup>-</sup> allele in mice. **(c)** Identification of the recombinant *Trpm4*<sup>L3F2</sup> and *Trpm4*<sup>L2F2</sup> alleles in ES cells by Southern blot analysis (*Afl*II digest) using 5' and a 3' probes placed external to the targeted sequence. The *Trpm4*<sup>L2F2</sup> allele may arise upon incomplete homologous recombination of the targeting construct and lacks the first loxP site located between exon 14 and 15 in the *Trpm4*<sup>L3F2</sup> allele. **(d)** Cre-mediated generation of the *Trpm4*<sup>-</sup> allele in mice resulted in the conversion of the 10.1kb fragment of the *Trpm4*<sup>L3F2</sup> allele to a 2.2kb fragment (TG-1 probe, *Hind*III digest) and the conversion of the 11.9kb fragment of the *Trpm4*<sup>L3F2</sup> allele to a 2.8kb fragment (TG-2 probe, *Nhe*I digest).
