# Supplementary material for: Increased IgE-dependent mast cell activation and anaphylactic responses in mice lacking the calcium-activated nonselective cation channel TRPM4
Source: Springer Nature journal article supplement (doi:10.1038/ni1441), 2007-02-11
Supplement: 41590_2007_BFni1441_MOESM33_ESM.pdf [file 41590_2007_BFni1441_MOESM33_ESM.pdf]

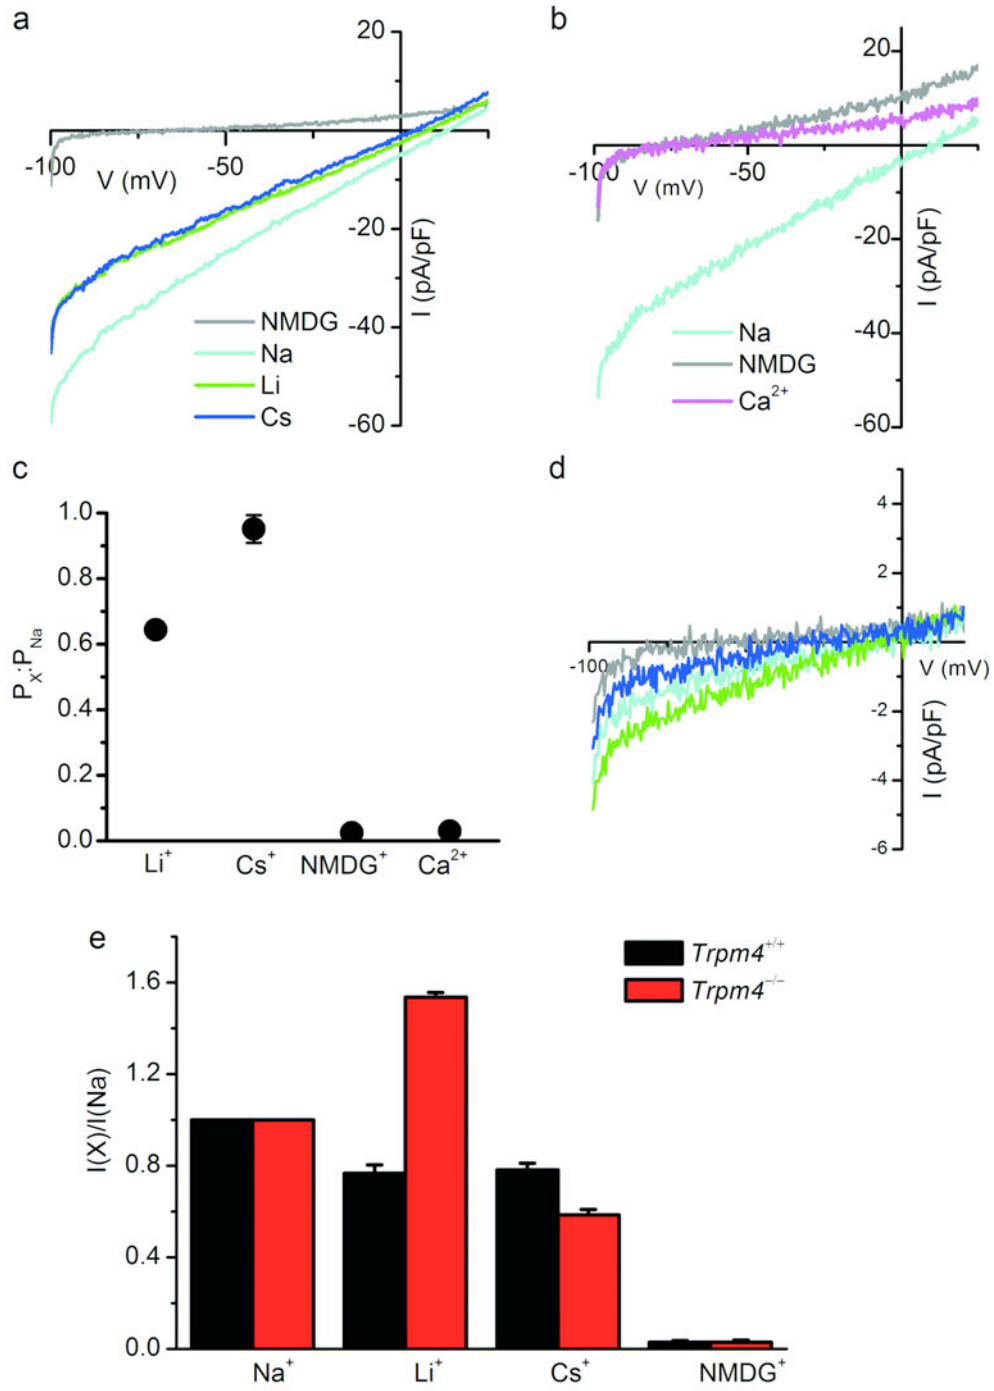

**Supplementary Figure 3.** Permeation properties of the endogenous  $\text{Ca}^{2+}$ -activated cation current in BMMCs. **(a)** Whole cell current traces from a *Trpm4*<sup>+/+</sup> BMMC in response to linear voltage ramps from -100 to +100 mV ( $V_h = 0\text{mV}$ ), dialyzed with  $10\mu\text{M}$   $\text{Ca}^{2+}$  pipette solution, in an extracellular solution containing 156mM  $\text{Na}^+$ ,  $\text{Li}^+$ ,  $\text{Cs}^+$  or  $\text{NMDG}^+$  as indicated. **(b)** Current traces as in panel **a**, in an extracellular solution containing 156mM  $\text{Na}^+$ , 156mM  $\text{NMDG}^+$  or 100mM  $\text{Ca}^{2+}$  as indicated. **(c)** Permeability ratios for different cations calculated after correction of the reversal potential of currents as in panel **a** for the liquid junction potential, as described in<sup>2</sup>. ( $n=6-8$ ). **(d)** Current traces from *Trpm4*<sup>-/-</sup> BMMCs in response to a voltage protocol as in panel **a**. Colors are the same as in panel **a**. **(e)** Normalized current values for different cation-containing extracellular solutions from *Trpm4*<sup>+/+</sup> and *Trpm4*<sup>-/-</sup> cells (as in panels **a-d**), measured at  $-80\text{mV}$ . Currents were normalized to the value in 156mM  $\text{Na}^+$ -containing solution (*Trpm4*<sup>+/+</sup>,  $n=6$ ; *Trpm4*<sup>-/-</sup>,  $n=8$ ).
