# Supplementary material for: Increased IgE-dependent mast cell activation and anaphylactic responses in mice lacking the calcium-activated nonselective cation channel TRPM4
Source: Springer Nature journal article supplement (doi:10.1038/ni1441), 2007-02-11
Supplement: 41590_2007_BFni1441_MOESM35_ESM.pdf [file 41590_2007_BFni1441_MOESM35_ESM.pdf]

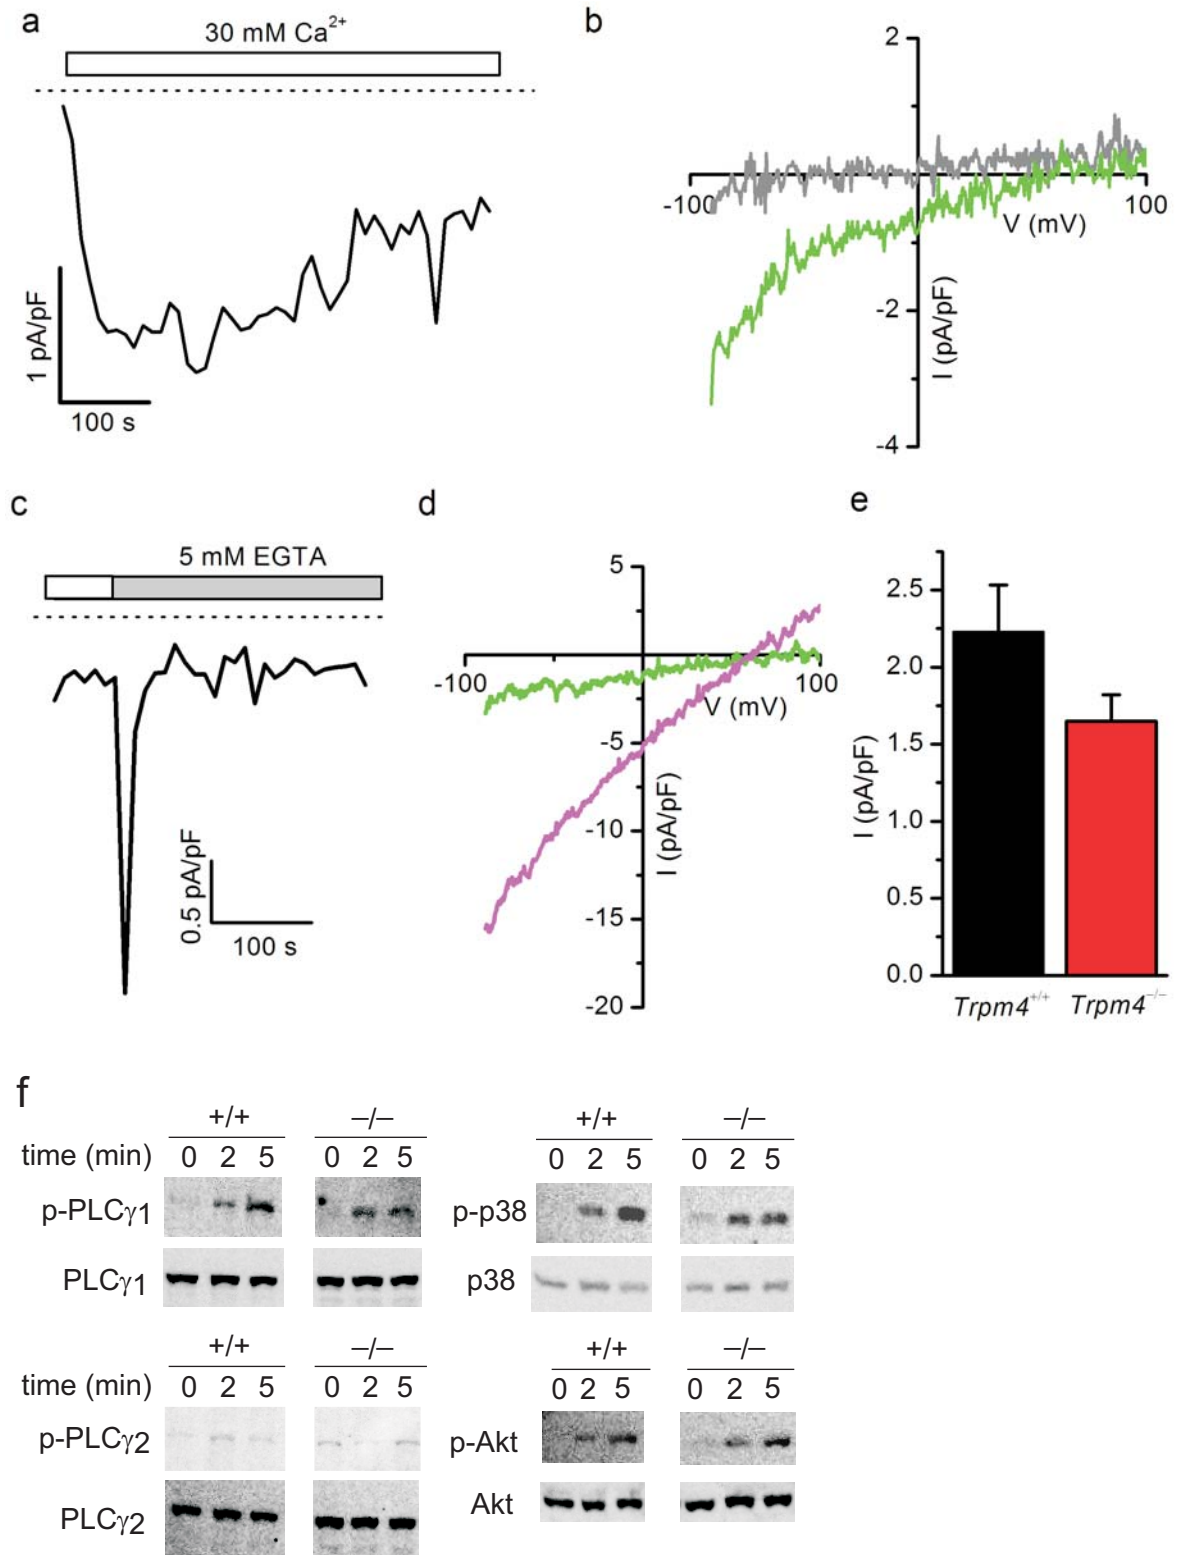

**Supplementary Figure 5. (a-e)** CRAC in *Trpm4*<sup>+/+</sup> and *Trpm4*<sup>-/-</sup> BMMCs. **(a)** Time course of a whole cell recording at -80mV with a pipette solution containing 10mM BAPTA and 50μM IP<sub>3</sub> in 120mM CsAsp, 20mM CsCl, 2mM MgCl<sub>2</sub>, 1mM Na<sub>2</sub>ATP, 10mM Hepes, pH7.2. Extracellular solution contained 30mM Ca<sup>2+</sup>. A representative example is shown for a *Trpm4*<sup>+/+</sup> cell. **(b)** Representative current traces taken from an experiment as in panel **a**, at the beginning of the experiment (grey trace) and after reaching the plateau (green trace). Currents were corrected for leak currents as previously described<sup>3</sup>. **(c)** Experiment and pipette solution as in panel **a**. After full activation of I<sub>CRAC</sub> extracellular solution was switched from 30mM Ca<sup>2+</sup> (open bar) to 0mM Ca<sup>2+</sup> (5mM EGTA; grey bar). **(d)** Representative current traces taken from an experiment as in panel **c**, in 30mM Ca<sup>2+</sup> solution (green trace) and at the peak value after switching to 0mM Ca<sup>2+</sup> solution (pink trace). The transient increase of the current upon switching to Ca<sup>2+</sup>-free medium is typical behavior for the I<sub>CRAC</sub> current<sup>3</sup>. **(e)** Mean values for the current in 30mM Ca<sup>2+</sup> solution measured at -80mV for *Trpm4*<sup>+/+</sup> and *Trpm4*<sup>-/-</sup> BMMCs. *n*= 10 for both genotypes, *P* > 0.05. **(f)** FcεRI-induced activation of PLCγ1, PLCγ2, p38 and Akt. *Trpm4*<sup>+/+</sup> and *Trpm4*<sup>-/-</sup> BMMCs sensitized with anti-DNP IgE were stimulated with DNP for the indicated time intervals. Total cell lysates were separated by 7 and 10% SDS-PAGE, and lysates were immunoblotted with indicated antibodies. Data are representative of at least three independent experiments and independent cell preparations.
