# Supplementary material for: Increased IgE-dependent mast cell activation and anaphylactic responses in mice lacking the calcium-activated nonselective cation channel TRPM4
Source: Springer Nature journal article supplement (doi:10.1038/ni1441), 2007-02-11
Supplement: 41590_2007_BFni1441_MOESM36_ESM.pdf [file 41590_2007_BFni1441_MOESM36_ESM.pdf]

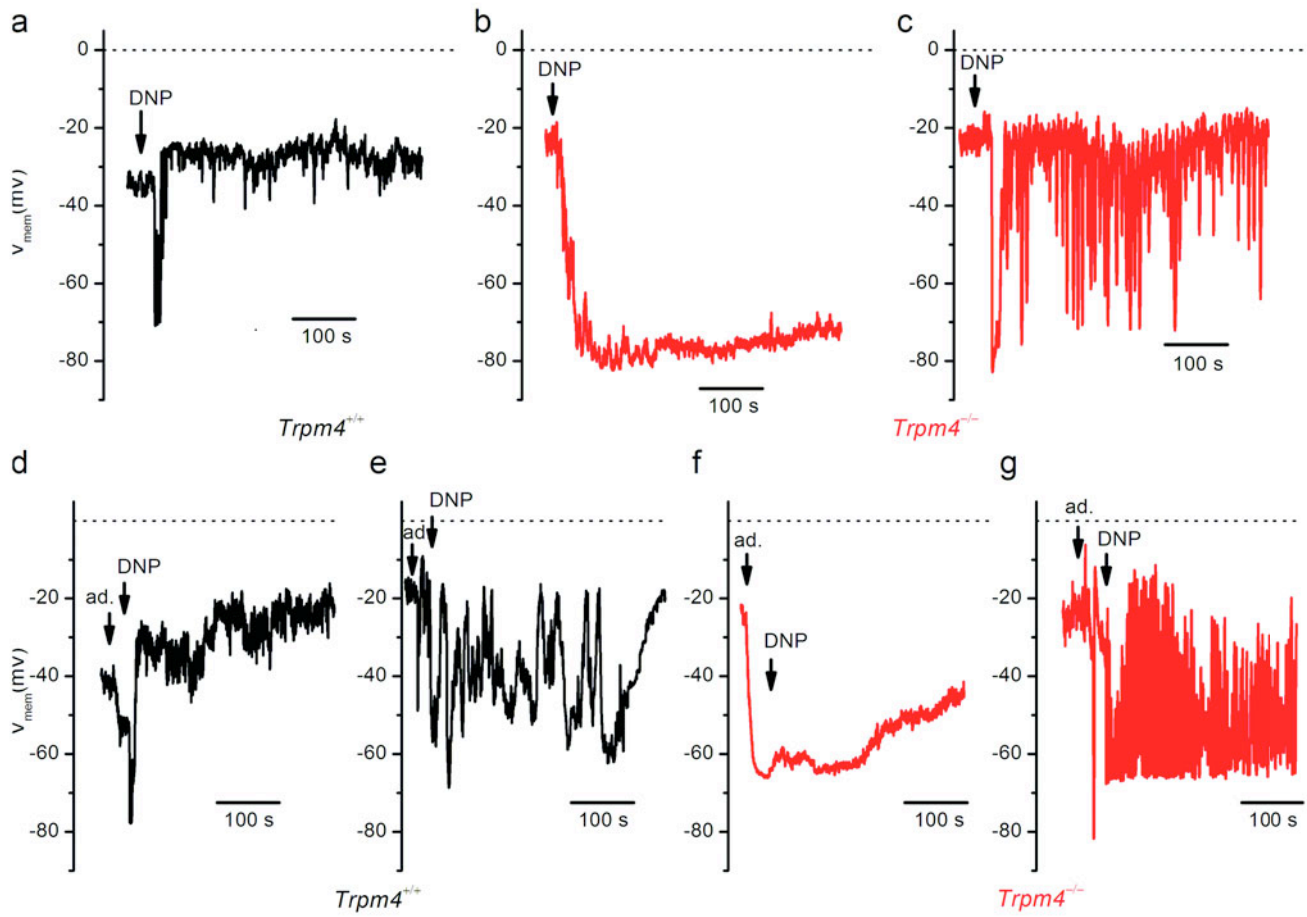

**Supplementary Figure 6.** Membrane potential measurements in BMDCs after antigen stimulation. Measurements were performed in the whole-cell current clamp mode using perforated patches. **(a)** Representative membrane potential changes at indicated time periods after application of 100ng/ml DNP-HSA application (arrow) to *Trpm4*<sup>+/+</sup> BMDC (n=19). **(b,c)** Same as in panel **a**, but with *Trpm4*<sup>-/-</sup> BMDCs (n=15). **(d,e)** Representative traces of membrane potential changes after application of 10μM adenosine (ad.) followed by 100ng/ml DNP-HSA (DNP) to *Trpm4*<sup>+/+</sup> BMDCs (n=7). **(f,g)** Same as in panels **d** and **e**, but with *Trpm4*<sup>-/-</sup> BMDCs (n=7).
