# Supplementary material for: Increased IgE-dependent mast cell activation and anaphylactic responses in mice lacking the calcium-activated nonselective cation channel TRPM4
Source: Springer Nature journal article supplement (doi:10.1038/ni1441), 2007-02-11
Supplement: 41590_2007_BFni1441_MOESM37_ESM.pdf [file 41590_2007_BFni1441_MOESM37_ESM.pdf]

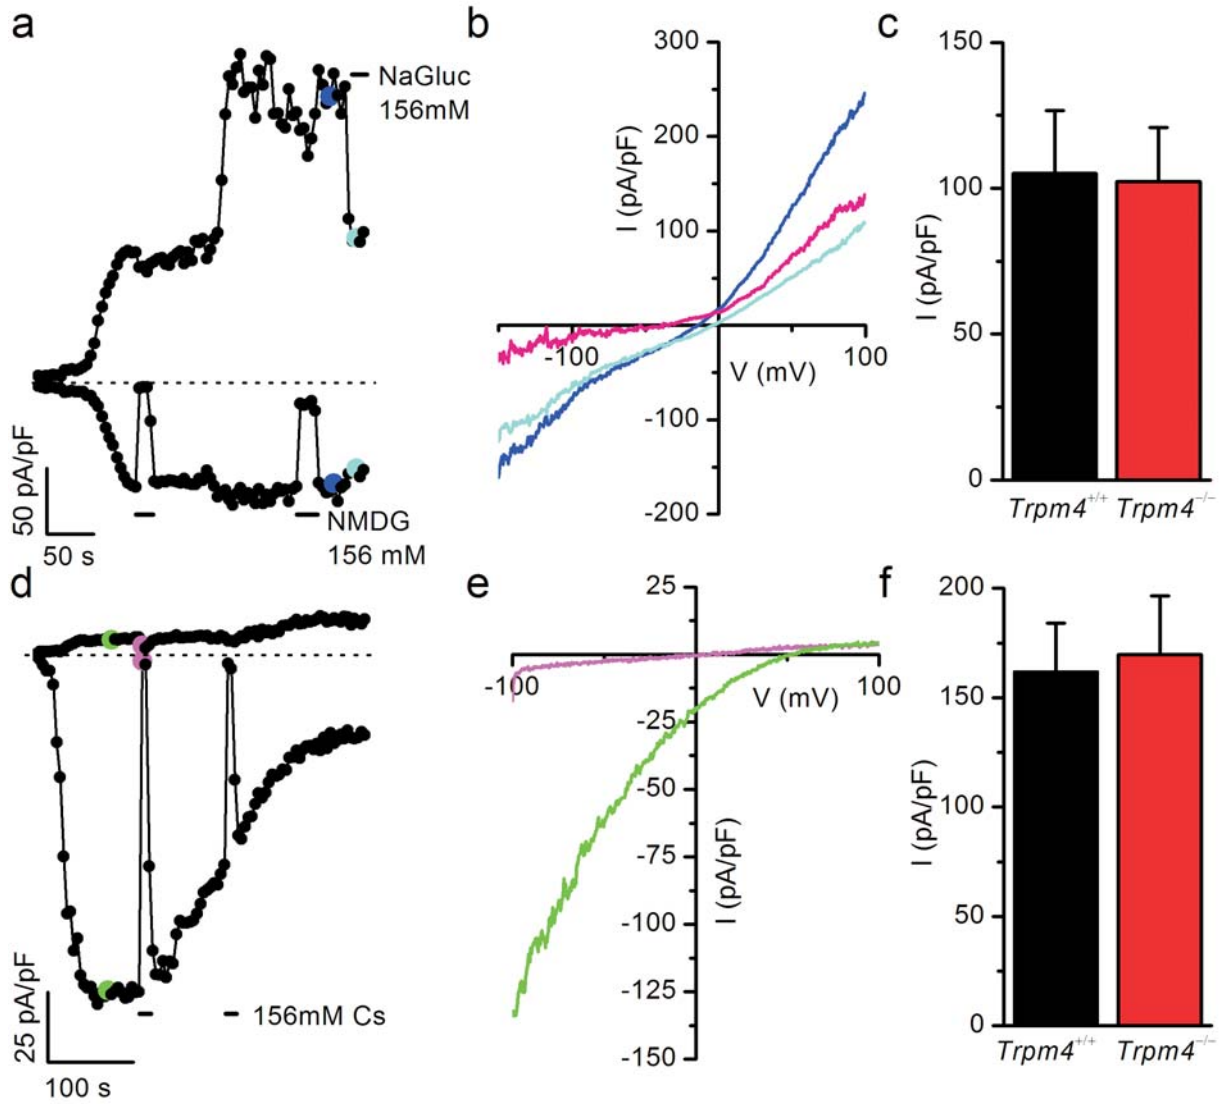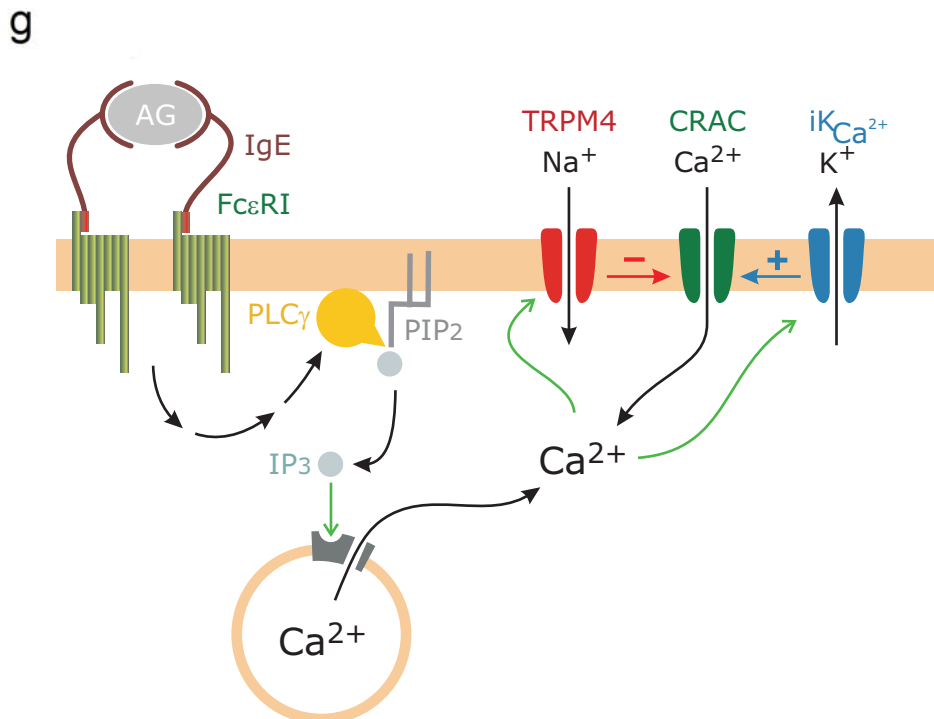

**Supplementary Figure 7. (a-f)**  $\text{Ca}^{2+}$  activated  $\text{K}^+$  and  $\text{Cl}^-$  currents in  $\text{Trpm4}^{+/+}$  and  $\text{Trpm4}^{-/-}$  BMMCs. (a) Time-course of a whole cell patch clamp recording at -80 and +80mV from a  $\text{Trpm4}^{+/+}$  mast cell. Pipette solution contained  $10\mu\text{M Ca}^{2+}$ , and  $\text{Na}^+$  instead of  $\text{K}^+$ . Voltage protocol as in **Fig. 2**. Bars specify the application of 156mM NMDG and 156mM NaGluconate (both replacing NaCl) containing bath solution, as indicated. (b) Representative current traces in response to a linear voltage protocol, taken at the indicated points in panel a (coloured points). The pink trace depicts the difference in the current in normal or 156mM NaGluconate-containing bath solution, and represents the pure  $\text{Cl}^-$  current. (c) Mean amplitude of the NaGluconate-sensitive current at +80mV from  $\text{Trpm4}^{+/+}$  ( $n=25$ ) and  $\text{Trpm4}^{-/-}$  ( $n=28$ ) BMMCs.  $P > 0.1$ . (d) Time course at -80 and +80mV from a  $\text{Trpm4}^{+/+}$  mast cell. Pipette solution contained  $10\mu\text{M Ca}^{2+}$ , and  $\text{Na}^+$  instead of  $\text{K}^+$ . Extracellular solution contains 156mM KCl. Bars specify the perfusion of a 156mM CsCl containing bath solution (replacing KCl). (e) Representative current traces taken at the indicated times in panel d (colored points). (f) Mean amplitude of the  $\text{Cs}^+$ -sensitive current from  $\text{Trpm4}^{+/+}$  ( $n=10$ ) and  $\text{Trpm4}^{-/-}$  ( $n=10$ ) BMMCs.  $P > 0.1$ . (g) Schematic model showing the role of TRPM4 in FcεRI induced  $\text{Ca}^{2+}$  signalling in mast cells. Crosslinking of the FcεRI receptor results in activation of several signaling molecules and adaptor proteins. A major downstream target is phospholipase  $\text{C}\gamma 1$ , which catalyzes the hydrolysis of phosphatidylinositol(4,5) $\text{P}_2$  to diacylglycerol and inositol(1,4,5) $\text{P}_3$  ( $\text{IP}_3$ ). The latter releases  $\text{Ca}^{2+}$  from intracellular  $\text{Ca}^{2+}$  stores through activation of  $\text{IP}_3$  receptors. Upon store-depletion, store-operated  $\text{Ca}^{2+}$  influx channels (CRAC channels) are activated through an (to date) unknown mechanism which will further increase the  $[\text{Ca}^{2+}]_{\text{cyt}}$ . Initial activation of  $\text{Ca}^{2+}$  activated  $\text{K}^+$  channels ( $i\text{K}_{\text{Ca}^{2+}}$ ) will hyperpolarize the membrane potential, increasing (“+”) the driving force for  $\text{Ca}^{2+}$  influx through CRAC channels. Subsequent activation of  $\text{Ca}^{2+}$  activated non-selective cation channels (TRPM4) will depolarize the membrane potential, limiting (“-“) the driving force for  $\text{Ca}^{2+}$  entry whereupon the  $\text{Ca}^{2+}$  signal can be terminated through the action of  $\text{Ca}^{2+}$  pumps. TRPM4 thus functions as a molecular brake on  $\text{Ca}^{2+}$  entry, and in  $\text{Trpm4}^{-/-}$  mast cells  $\text{Ca}^{2+}$  influx is largely increased upon FcεRI activation.
