# Supplementary material for: Increased IgE-dependent mast cell activation and anaphylactic responses in mice lacking the calcium-activated nonselective cation channel TRPM4
Source: Springer Nature journal article supplement (doi:10.1038/ni1441), 2007-02-11
Supplement: 41590_2007_BFni1441_MOESM38_ESM.pdf [file 41590_2007_BFni1441_MOESM38_ESM.pdf]

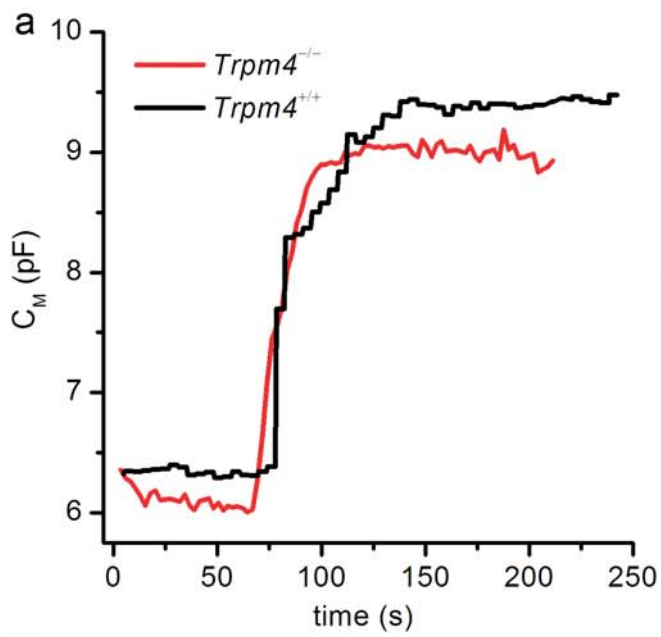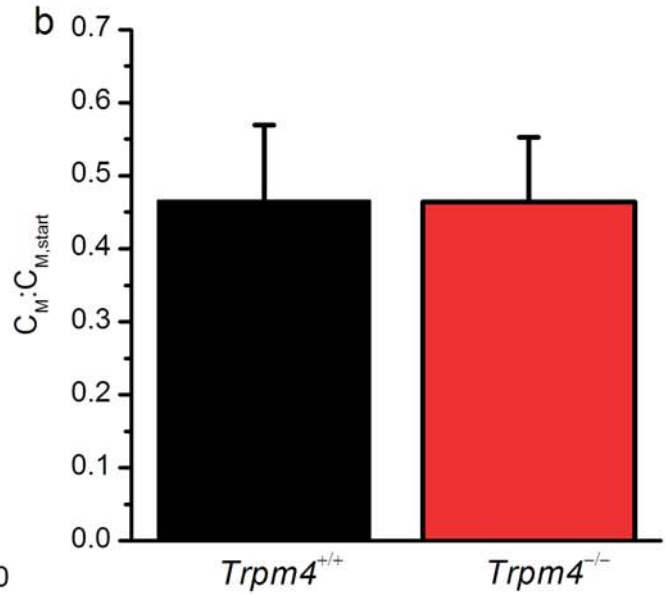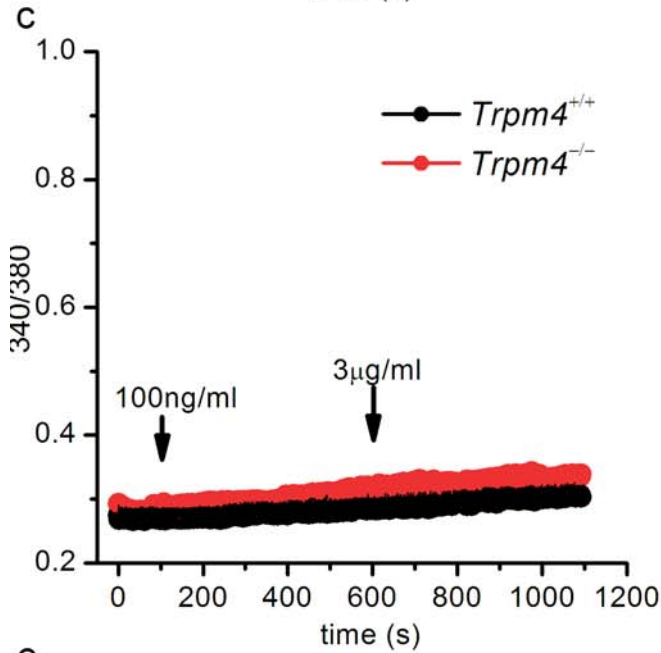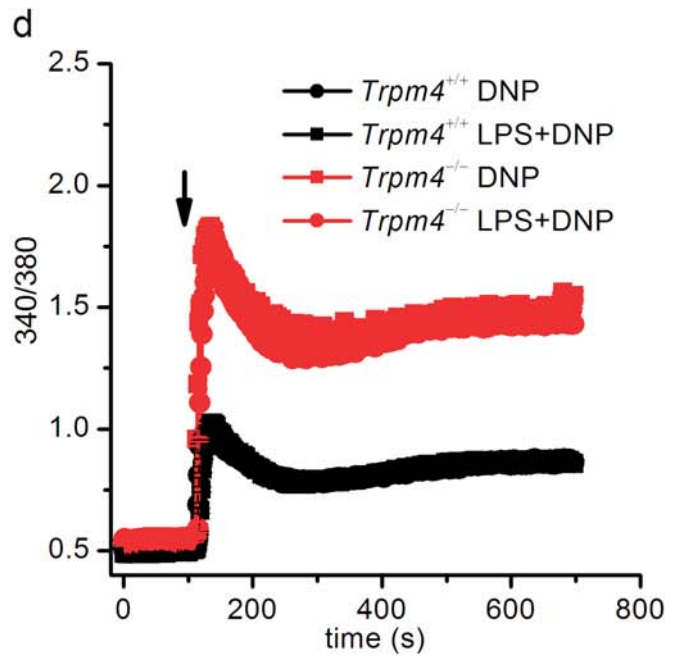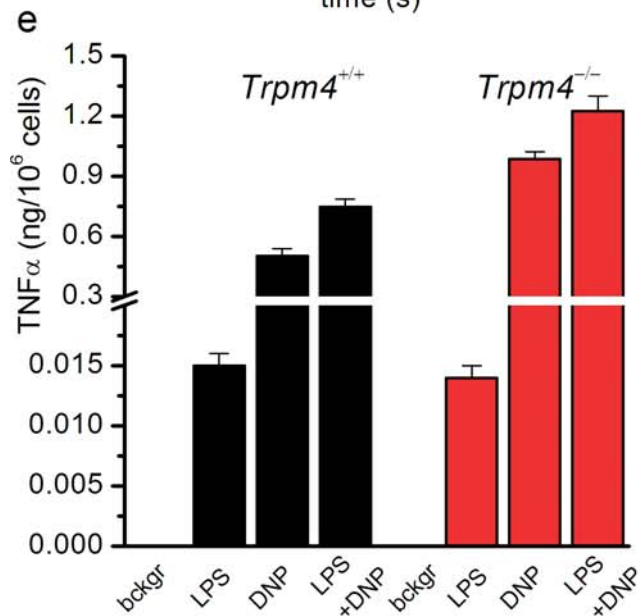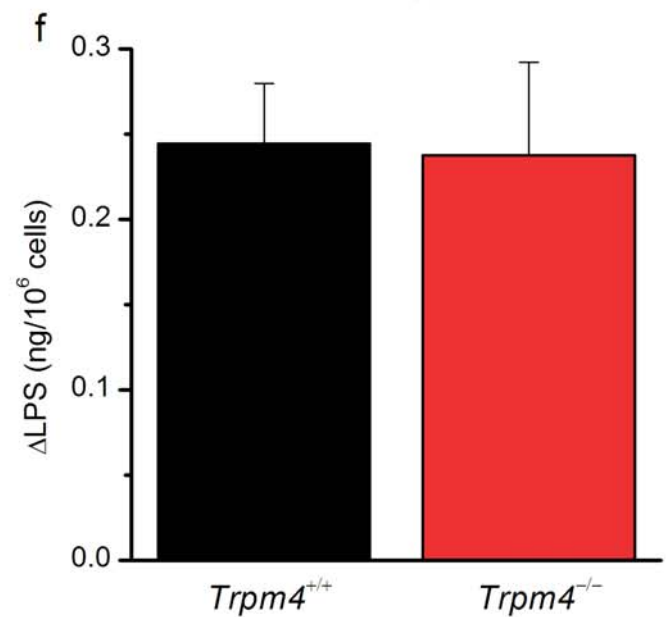

**Supplementary Figure 8. (a-b)** GTP $\gamma$ S-induced capacitance changes in *Trpm4*<sup>+/+</sup> and *Trpm4*<sup>-/-</sup> BMMCs. **(a)** Representative traces for membrane capacitance changes of *Trpm4*<sup>+/+</sup> and *Trpm4*<sup>-/-</sup> BMMCs after break-in with 100 $\mu$ M GTP $\gamma$ S containing pipette solution. **(b)** Averaged ratio of membrane capacitance 10 min after break-in and at the start of the recording ( $n=6$  per genotype,  $P > 0.05$ ). **(c-e)** Stimulation of *Trpm4*<sup>+/+</sup> and *Trpm4*<sup>-/-</sup> BMMCs with LPS. BMMCs express TLR4 which serves as a receptor for bacterially derived LPS<sup>4</sup>. **(c)** Averaged [Ca<sup>2+</sup>]<sub>cyt</sub> during stimulation of *Trpm4*<sup>+/+</sup> ( $n=119$ ) and *Trpm4*<sup>-/-</sup> ( $n=138$ ) BMMCs with 100ng/ml and 3 $\mu$ g/ml LPS (*E. coli* 055:B5, identical results were obtained with *E. coli* 0111:B4 LPS) in standard extracellular medium. Identical results were obtained when 3 $\mu$ g/ml LPS was applied first. **(d)** Averaged [Ca<sup>2+</sup>]<sub>cyt</sub> during stimulation of BMMCs with 100ng/ml DNP-HSA (DNP; *Trpm4*<sup>+/+</sup>  $n=111$ , *Trpm4*<sup>-/-</sup>  $n=142$ ) and 3 $\mu$ g/ml LPS + 100ng/ml DNP-HSA (LPS+DNP; *Trpm4*<sup>+/+</sup>  $n=169$ , *Trpm4*<sup>-/-</sup>  $n=174$ ). Arrow indicates addition of stimuli. **(e)** TNF release from *Trpm4*<sup>+/+</sup> and *Trpm4*<sup>-/-</sup> BMMCs prior to (bckgr) and after stimulation with 3 $\mu$ g/ml LPS (LPS), 100ng/ml DNP-HSA (DNP) or 3 $\mu$ g/ml LPS + 100ng/ml DNP-HSA (LPS+DNP) for 3 h. Mean values are obtained from 4 independent experiments,  $n$  values represents number of cells,  $P < 0.01$ . **(f)** Mean difference in TNF released from *Trpm4*<sup>+/+</sup> and *Trpm4*<sup>-/-</sup> BMMCs stimulated by LPS+DNP and DNP alone, as in panel c. Mean values are obtained from 4 independent experiments;  $P > 0.1$ .
